# Next Generation Sequencing Reveals Regulation of Distinct *Aedes* microRNAs during Chikungunya Virus Development

Jatin Shrinet, Shanu Jain, Jaspreet Jain, Raj K. Bhatnagar\*, Sujatha Sunil\*

International Centre for Genetic Engineering and Biotechnology, New Delhi, India

## Abstract

**Background:** Application of genomics and Next Generation sequencing has led to the identification of new class of cellular functional molecules, namely, small RNAs. Of the several classes of ncRNAs (non-coding RNA), microRNAs have been demonstrated to exert determinative influence on various cellular processes. It is becoming abundantly clear that host/vector/pathogen encoded microRNAs impact eventual pathogenesis. In this context, the participation of vector based microRNAs in disease transmission and pathogen development is being investigated intensively. A few studies have highlighted the role of vector encoded microRNAs in pathogen infection. We conducted this study to evaluate the role of host miRNAs upon CHIKV (Chikungunya Virus) infection in an important vector, *Aedes albopictus*.

**Findings:** We identified 88 and 79 known miRNAs in uninfected and CHIKV infected *Ae. albopictus* Singh's cell line respectively. We further identified nine novel miRNAs in *Ae. albopictus*. Comparison of the two libraries revealed differential expression of 77 common miRNAs between them. CHIKV infection specifically altered the miRNA profile of a specific set of eight miRNAs. Putative targets of these regulated miRNAs were identified and classified into their pathways.

**Conclusions:** In our study we have identified and described the profiles of various miRNAs upon CHIKV infection in *Ae. albopictus*. This investigation provides an insight about cellular modification by miRNAs during CHIKV infection and the results provide leads for identifying potential candidates for vector based antiviral strategies.

**Citation:** Shrinet J, Jain S, Jain J, Bhatnagar RK, Sunil S (2014) Next Generation Sequencing Reveals Regulation of Distinct *Aedes* microRNAs during Chikungunya Virus Development. *PLoS Negl Trop Dis* 8(1): e2616. doi:10.1371/journal.pntd.0002616

**Editor:** José M. C. Ribeiro, National Institute of Allergy and Infectious Diseases, United States of America

**Received:** July 1, 2013; **Accepted:** November 20, 2013; **Published:** January 9, 2014

**Copyright:** © 2014 Shrinet et al. This is an open-access article distributed under the terms of the Creative Commons Attribution License, which permits unrestricted use, distribution, and reproduction in any medium, provided the original author and source are credited.

**Funding:** The study has been funded by Department of Biotechnology, Government of India grant BT/PR14725/AGR/36/672/2010 and Department of Science and Technology, Government of India grant SR/SO/BB-0023/2011 awarded to SS. SS is a recipient of Ramanujan Fellowship, Department of Science and Technology, Government of India and their support is duly acknowledged. The funders had no role in study design, data collection and analysis, decision to publish, or preparation of the manuscript.

**Competing Interests:** The authors have declared that no competing interests exist.

\* E-mail: raj@icgeb.res.in (RKB); sujatha@icgeb.res.in (SS)

## Introduction

Vector borne diseases like malaria, dengue, chikungunya are a major burden to the economy of countries in the tropical and sub-tropical regions. The situation in Asian countries like India are especially alarming with recent studies predicting India to have the maximum global burden of dengue [1] and encompassing nearly 46% of global population at risk for vivax malaria [2]. Currently, no vaccines are available for any of the above mentioned infections and vector control with intense public awareness is the only effective measure for disease control. Transmission blocking approaches provide hope for disease control in laboratory conditions [3] which clearly emphasizes the importance of understanding vector-pathogen dynamics for effective control strategies.

Insects play an important role in disease transmission in plants, animals and humans. Mosquitoes are especially significant in disease transmission in humans. Fundamental biological process of blood feeding in female mosquitoes for egg development is utilized by pathogens either for completing their life cycle or amplifying within the mosquito before infecting the mammalian hosts. Until

now, mechanisms involved in disease transmission were obscure. With the recent onslaught of several arboviral epidemics and increase of vector transmitted diseases, several studies, both genetic and non-genetic, have established the molecular mechanisms that may be involved in the host seeking behavior of mosquitoes [4,5], their response to pathogens [6,7] and those factors of pathogen development within the vector affecting transmission [8,9].

RNA interference is the most important phenomena used by insects as the first line of defense against microbial invaders and has been extensively studied in the recent times [10–13]. Infection of mosquitoes by virus results in generation of different kind of small RNA populations of viral origin, namely 22 nt siRNA population [14], longer nt piRNA population [15,16] as well as modulation of host miRNAs [17–19]. MicroRNAs are a class of small (19–24 nt in length), non-coding, single stranded RNAs known to post-transcriptionally regulate gene expression by binding to 3' untranslated regions (3'UTRs) of the target mRNAs, resulting in translational repression/cleavage of the cognate mRNAs. First identified in *Caenorhabditis elegans*, miRNAs have since been identified in a variety of organisms including plants,

## Author Summary

Small, non-coding, RNAs such as microRNAs (miRNA) of length 18–24 nucleotide are reported in wide range of organisms and known to play a determinative role in regulation of various cellular processes. They have also reported to have regulatory roles during pathogen infection, maturation and transmission. Chikungunya virus is an important alphavirus transmitted through two important vectors, *Aedes aegypti* and *Ae. albopictus*. While *Ae. aegypti* has been the preferred vector for transmission of this virus, recently, *Ae. albopictus* has gained notoriety for disease transmission. Using Illumina platform, we sequenced the small RNA population an *Aedes albopictus* cell line infected with chikungunya virus. We studied the expression modulation of miRNAs upon CHIKV infection and found distinct set of miRNAs regulated in *Aedes* upon CHIKV infection. We further predicted the targets of these miRNAs and performed pathway analysis of these targets. The cellular functional targets of some of these miRNAs overlapped suggesting aggressive participation of the targeted pathways in establishing CHIKV infection.

animals, insects and viruses [20]. Their function primarily is regulation of gene expression and play crucial roles in cell development, proliferation, differentiation, host defense, fat metabolism and apoptosis [21].

We undertook the present study to identify mosquito host miRNAs that may be impacted during chikungunya infection. For this purpose, we performed deep sequencing of small RNA population in *Aedes albopictus* Singh's cell line upon chikungunya virus infection. We identified several *Aedes* known and novel miRNAs and profiled their expression during CHIKV infection. In a separate study we had identified microRNAs in *Anopheles stephensi* mosquitoes and profiled these miRNAs upon *Plasmodium* infection [22]. During the course of analysis, we recognized there were miRNAs common between *Aedes* and *Anopheles*; however, there was discrete regulation of some of the common miRNAs upon infection by CHIKV and *Plasmodium*. In this report, we describe *Ae. Albopictus* miRNAs and their regulation upon CHIKV infection. Furthermore, we highlight the repertoire of common and distinct host miRNAs regulated during *Plasmodium* and CHIKV infections in their respective hosts. We also have predicted the targets of some of these miRNAs in a bid to understand the role these miRNAs may be playing during pathogen infection in mosquitoes.

## Methods

### Cell culture and virus infection

*Ae. albopictus* cell line Singh's line (ATCC-CCL-126) was maintained at 28°C in DMEM media supplemented with 10% FBS and antibiotics. The cells were infected with MOI = 10 of the wild type chikungunya virus (Accession no. JF950631.1) isolated from India during an outbreak in 2010 [23]. Cells were infected in triplicates and harvested 24 hours post infection and processed further for small RNA sequencing.

### Small RNA sequencing

Illumina Truseq small RNA libraries for two samples, namely, *Ae. Albopictus* Singh's cell line uninfected (SL) and *Ae. albopictus* Singh's cell line infected with CHIKV (iSL) were made using manufacturer's instructions (Illumina Inc). Briefly, 1 µg of total RNA was ligated with 3' and 5' adaptors in sequential steps and

reverse transcribed using RT primers. Following amplification of the adaptor enriched fragments, population of small RNA within length 140–160 bps were eluted from 6% TBE PAGE gel. Eluted products were precipitated using sodium acetate and ethanol and dissolved in RNase free water. The samples were quantified using the Total RNA Nano chip in Bioanalyzer. Deep sequencing was performed using Illumina Genome Analyzer II.

### Data analysis pipeline

**Identification of known microRNAs.** Data was analyzed using an in-house pipeline developed for this purpose (Figure S1). Mature miRNA sequences and pre-miRNA sequences of all insect species available including *Aedes aegypti* (Aae), *Anopheles gambiae* (Aga), *Acyrtosiphon pisum* (Api), *Apis mellifera* (Ame), *Bombyx mori* (Bmo), *Culex quinquefasciatus* (Cqu), *Drosophila melanogaster* (Dme) and *Tribolium castaneum* (Tca) were downloaded from miRBase database V.19 [24]. All the sequences were combined for the analysis and 100% similar sequences were pooled together using CD-HIT web tool [25] to reduce data redundancy. Other non-coding RNAs (ncRNA) were downloaded from ncRNA database [26]. Sequences representing coding region of *Aedes aegypti*, *Anopheles stephensi* and *An. gambiae* genomes were also downloaded from Vectorbase [27] using BioMart tool. The tools Bowtie, RNAfold and RNAplot used in this study were downloaded and incorporated in our in-house PERL based pipeline developed for small RNA analysis. All the downloaded sequences were indexed using Bowtie [28] and used for the analysis. Analysis for all libraries was performed separately. Reads derived from deep sequencing were trimmed and filtered to fetch sequences having length  $\geq 18$  bases. Hundred percent matched sequences were pooled together to generate fasta files (expression file) having the unique number along with read counts for each of the unique sequence as an ID, for further analysis. The filtered reads (length  $\geq 18$ ) were aligned against the mature miRNA sequences using Bowtie allowing one mismatches and taking other parameters as default.

**Identification of novel miRNA.** For identification of novel miRNAs, unmatched sequences after the known miRNA prediction were mapped to pre-miRNA sequences keeping the same parameters as used for known miRNA prediction. For prediction of novel miRNAs, the pre-miRNA unmatched reads were mapped to ncRNA sequences to filter out any other non-coding RNAs from the libraries. The unmatched sequences after this step were then matched to coding region of *Ae. aegypti*, *An. gambiae* and *An. stephensi* to filter out the sequences falling in coding regions. The final set of unmatched sequences were then matched to respective genomes and matched sequences were subjected to novel miRNA prediction pipeline which uses RNAfold and RNAplot [29] for secondary structure prediction of pre-miRNA and mapping of small RNA into the pre-miRNA. Those sequences matching to the genome, 75 nt flanking region from both sides of the small RNA sequences were fetched as precursor sequences. These pre-sequences were then folded and energies were calculated by RNAfold and RNAplot. Novel miRNA sequences were then filtered on the basis three main criteria: the hairpin loop structure of the fetched precursor sequence, the presence of the small RNA sequence in any of the arm of precursor sequence, energy  $\leq -20$  KJ/mol.

**Relative abundance and expression profiling of microRNAs from small RNA sequencing libraries.** miRNA abundance in both libraries were calculated after normalizing the reads. The samples were normalized by calculating tag per million of total RNA reads (TPM) and was used for comparing relative abundance of specific microRNAs within each data set. For the purpose of identification of known miRNAs from different

organisms, our pipeline was designed in a manner to treat reads with even single nucleotide variation and also reads with different lengths as a distinct small RNA. However, for profiling the relative abundance of miRNAs, we combined all read counts with same miRNA names so as to reduce redundancy in data and to increase accuracy of the reads count of the miRNAs. The miRNAs in iSL (Singh's cell line infected with CHIKV) were further profiled against the SL (Singh's cell line uninfected) to identify the differentially expressed miRNAs upon CHIKV infection.

**Expression profiling of miRNA by real time PCR.** From the list of miRNAs, two miRNAs namely miR-281-5p and miR-75p were selected at random. Real time PCR analysis was performed using ncode real time PCR kit (cat. MIRCQ 100). Real time PCR was set up in triplicates for miRNAs of uninfected and 24 hours CHIKV infected cells as per the manufacturer's instructions. 5.8 s rRNA was used as an endogenous control for miRNA expression profiling. Expression levels were then calculated against SL as a calibrator using  $2^{-\Delta\Delta C_T}$  method.

**Comparison of miRNA expression profiles in different vectors upon pathogen infection.** miRNAs identified in the present study were compared with miRNAs identified in a recent study [22] to understand the behavior of these miRNAs in different mosquitoes infected by pathogens specific to them. miRNAs that were common were analyzed to understand mosquito/pathogen specific miRNA regulation.

**Statistical analysis.** Statistical tests for identifying significant differentially expressed miRNAs were performed using edgeR module with few modifications in the script. The pvalue cutoff was performed on the data with the significance threshold selected as 0.05.

**Target prediction of microRNAs and pathway analysis.** For identifying putative targets of differentially up regulated miRNAs, 3' UTR sequences of *Ae. aegypti* and *An. gambiae* were downloaded from VectorBase and were subjected to target prediction using RNA hybrid tool [30]. The targets were filtered on the basis of complementarity of the miRNA with the targets and energy of the miRNA:target duplex  $\leq -20$  Kcal/mol. The targets of selected down-regulated and up-regulated miRNAs were further subjected to KOBAS analysis for the identification of significant pathways, selecting the species as *Ae. aegypti* and *An. gambiae* and KEGG as pathway database keeping the threshold p value  $\leq 0.05$  [31]. The vectorbase ID for the targets of significant pathways were then used to generate the miRNA:mRNA interaction network. Cytoscape was used for visualizing the networks [32].

## Results

### Characterization of Aedes miRNAs in *Ae. albopictus* cell line

To evaluate the impact of CHIKV infection on *Ae. albopictus* miRNAs, we carried out high throughput small RNA sequencing using Illumina platform on small RNA libraries obtained from CHIKV infected *Ae. albopictus* cell line Singh's line and compared it with uninfected cell line. Details of small RNA sequencing data generation of the two libraries and subsequent analyses are detailed in **Table 1**. In the libraries, there was an overall reduced number of reads in iSL as opposed to SL which could be due to the impact of infection. There was a bimodal pattern of reads, one distinct peak at 22 nt and another peak at 27–30 nt in both libraries. A total of 79.19% reads of SL, 81.94% reads of iSL were mappable and these reads were mapped against *Ae. aegypti* genome. Analysis pipeline for identification of known microRNAs included zero and one mismatch to accommodate the sequence differences between *Ae. albopictus* and *Ae. aegypti*. The remaining raw reads

were then mapped against chikungunya genome to discover CHIKV encoded small RNA population. We found a total of 18589 reads ( $\geq 16$  nt) mapping against chikungunya genome which was too low. We suspect that the overall lesser number of reads in the infected library to be a reason for this reduced number of virus derived small RNA population.

Mapping of reads from both SL and iSL against known mature miRNA library resulted in identification of 88 and 79 miRNAs of SL and iSL respectively (**Table 2**). Among the identified miRNAs, 36 were conserved in three species of mosquitoes (*Aedes*, *Anopheles* and *Culex*) and 12 were conserved in all the eight species we used for our analysis.

Furthermore, a total of nine novel miRNAs were identified in both the libraries. Out of these miRNAs, novel-miR-2 was found to be having miR\*. The structures of these novel miRNAs are shown in **Figure S2**.

Mapping of known miRNAs was performed using the genome of *Ae. aegypti* as the genome of *Aedes albopictus* is not available. To accommodate the difference in the genome sequences, we extended the analysis to include miRNA reads having upto 2 mismatches with *Ae. Aegypti* genome. Our analysis with one mismatch revealed additionally 29 miRNAs in the libraries, namely, miR-11-5p, miR-12-3p, miR-184-5p, miR-1889-3p, miR-1889-5p, miR-275-5p, miR-277-5p, miR-278-5p, miR-286-3p, miR-2940-5p, miR-2941, miR-2945-5p, miR-296, miR-2951-3p, miR-2a-5p, miR-306-5p, miR-308-5p, miR-309b-3p, miR-316, miR-317-3p, miR-317-5p, miR-34-3p, miR-745-3p, miR-87, miR-92a-5p, miR-92b-5p, miR-980-5p, miR-998-5p and miR-9b. The identification of 29 new miRNA after allowing 1 mismatch also indicates the differences in *Aedes aegypti* and *Aedes albopictus* genomes (**Table 3**).

### Distribution and abundance of Aedes miRNAs

Further to identification of *Aedes* miRNAs, we analyzed the distribution and abundance of these miRNAs within the libraries. Among 90 miRNAs identified in this study, majority of miRNAs were found in both the libraries (n = 77). Eleven miRNAs were found only in uninfected SL (miR-1175-3p, miR-988-5p, miR-137, miR-219, miR-1, miR-193, miR-210-5p, miR-2796, miR-2944a-3p, miR-932-5p, miR-iab-8-5p), while two miRNAs (miR-286b and miR-1891) were found to be unique to iSL. When we performed the analysis with 1 mismatch, we were able to identify miR-286b reads in SL; however, miR-1891 was absent in uninfected library in 1 mismatch data (**Table 3**). With respect to novel miRNAs, all nine novel miRNA were found to be present in both SL and iSL libraries. Out of these miRNAs, two miRNAs, novel-miR-4 and novel-miR-9 showed significant up-regulation in iSL and 5 miRNAs, novel-miR1-5p, novel-miR-2-3p, novel-miR-5, novel-miR-7 and novel-miR-8 showed significant down-regulation in iSL library (**Table 4**).

Using the read counts, we further calculated the abundance of the miRNAs in the libraries. Using TPM values, the miRNAs were categorized into (i) significantly abundant (SA) with TPM greater than equal to 1000, (ii) moderately Abundant (MA) with TPM 100–999, (iii) abundant (A) with values ranging from 10–99 and (iv) rare (R) with values less than 10. In case of SL, 53 were found to be abundant, while in iSL, 51 were found to be abundant. Several miRNAs in iSL was rare (n = 29) while in SL, the number of miRNAs with counts less than 10 were 36 (**Table 2**). miR-184-3p was found to be the most abundant in SL as well as in iSL.

### Regulation of Aedes miRNAs upon CHIKV infection

Log fold change of miRNAs used in our study is depicted in **Fig. 1**. Statistical analysis performed using the edgeR package

**Table 1.** Details of small RNA sequencing information and subsequent data analysis.

| Sample name | Raw reads | Reads after adaptor trimming |       |             | Reads mapped to known microRNA |                        |           |           | Total miRNA identified | CHIKV mapped reads |
|-------------|-----------|------------------------------|-------|-------------|--------------------------------|------------------------|-----------|-----------|------------------------|--------------------|
|             |           | tRNA                         | rRNA  | ncRNA reads | snRNA, splicing CD-box;        | snRNA; snoRNA; CD-box; | HACA-box; | HACA-box; |                        |                    |
| SL          | 8647241   | 32270                        | 16010 | 4677        | 4280                           | 874                    | 1646718   | 89        | 0                      |                    |
| ISL         | 4618659   | 24663                        | 9294  | 1869        | 2406                           | 476                    | 758926    | 80        | 18589                  |                    |

doi:10.1371/journal.pntd.0002616.t001

revealed 41 miRNAs to be significant differentially expressed in *Aedes* (p value<0.05). It is noteworthy that most of the miRNAs were down-regulated upon CHIKV infection. Based on p-value and log fold change, we identified four miRNAs (miR-100, miR-283, miR-305-3p and miR-927) to be significantly over-expressed and four (miR-1000, miR-2b, miR-2c-3p and miR-190-5p) to be under-expressed.

To further validate the expression of these miRNAs, real-time PCR was performed on SL and iSL with miR-281-5p and miR-7 (Fig. 2). The miRNA expression profiles were found to be comparable to that derived from small RNA sequencing. The amplified products were cloned and sequenced.

### Target prediction and network analysis

Further to miRNA profiling, efforts were taken to identify putative targets of all the miRNAs that were regulated in *Aedes* upon CHIKV infection. Four significantly over-expressed miRNAs (miR-100, miR-283, miR-305-3p and miR-927) and 4 under-expressed miRNAs (miR-1000, miR-2b, miR-2c-3p and miR-190-5p) were analyzed for their putative targets. For the over-expressed miRNAs, 375 targets were identified for miR-100, 469 for miR-305-5p, 108 for miR-927, 186 for miR-283 and 395 targets for aal-miR-2944b-5p. For down-regulated miRNAs, 460 targets were identified for miR-1000, 226 for miR-2b, 263 for miR-2c-3p and 193 putative targets for miR-190-5p. These targets were further analyzed and clustered using KOBAS and the targets of the significantly represented pathways (p value<0.05) studied (Figure 3a). KOBAS analysis for up-regulated miRNAs revealed that the four up-regulated miRNAs targets the mRNAs playing role in seventeen different pathways. Out of all these pathways, Natural killer cell mediated cytotoxicity and Protein processing in endoplasmic reticulum pathways were common among miR-100, miR-283 and miR-305-3p. Citrate cycle (TCA cycle), dorso-ventral axis formation and valine, leucine and isoleucine degradation were found to be common between miR-100 and miR-305-3p and SNARE interactions in vesicular transport was commonly targeted by miR-927 and miR-305-3p. miR-305-3p was found to be mainly targeting the pathways essential for viral entry such as, ECM-receptor interaction, endocytosis, SNARE interactions in vesicular transport. Likewise in the case of down-regulated miRNAs, ribosome pathway was found to be common among miR-1000, miR-2b and miR-2c.

The interaction of these targets was studied and the miRNA:mRNA interaction network is shown in Fig. 3b. Several transcripts were targeted by two or more up-regulated and down-regulated miRNAs. However, three transcripts, AAEL008528, AAEL013939 and AAEL009042, were found to be common targets among the up-regulated miRNAs and transcript, AAEL003427 was found to be a common target among the down-regulated miRNAs. Detailed investigations are important to understand the role of these mRNAs during CHIKV development in *Aedes*.

### miRNA regulation is specific to vector and pathogen

An ongoing study in our laboratory identified miRNAs from *An. stephensi* and studied their temporal modulation upon *Plasmodium* infection. While analyzing the data, we recognized several common miRNAs between the two vectors namely, *Ae. albopictus* and *An. stephensi*. We now asked this question whether the modulation of these common miRNAs were species/pathogen specific. For this purpose, we studied the differential expression of these miRNAs. Upon analyzing the common miRNAs between the two vectors, 26 miRNA were found to be significant differentially expressed (p value<0.05). We also observed reper-

**Table 2.** Details of total miRNAs identified (0 mismatch) in *Aedes albopictus*.

| S. No. | Sequence                 | miRNA        | Singh's cell line | Infected Singh's cell line |
|--------|--------------------------|--------------|-------------------|----------------------------|
| 1      | TGAGATCATTTTGAAAGCTGATT  | bantam-3p    | 11771.15          | 7066.99                    |
| 2      | CCGGTTTTTCATTTTCGATCTGAC | bantam-5p    | 17.81             | 23.17                      |
| 3      | TGAGGTAGTTGGTTGATAGT     | let-7        | 2786.44           | 1912.68                    |
| 4      | TGGAATGTAAAGAAGTATGG     | miR-1        | 0.12              | 0                          |
| 5      | AACCCGTAGATCCGAACCTGTG   | miR-100      | 4167.34           | 5236.15                    |
| 6      | ATATTGCCTGCACAGCAGT      | miR-1000     | 3.82              | 0.87                       |
| 7      | TACCCTGTAGAACCGAATTTGT   | miR-10-5p    | 4.51              | 2.6                        |
| 8      | CATCACAGTCAGAGTCTTGCT    | miR-11-3p    | 6812.69           | 4749.86                    |
| 9      | TGAGATTCTACTTCTCCGACT    | miR-1175-3p  | 0.58              | 0                          |
| 10     | ACAAGTTTGTATCTCCGGTAT    | miR-125-3p   | 38.86             | 64.3                       |
| 11     | TCCCTGAGACCTTAACCTGTGA   | miR-125-5p   | 270.61            | 327.58                     |
| 12     | TGAGTATTACATCAGGTAAGTGT  | miR-12-5p    | 383.82            | 295.76                     |
| 13     | TTGGTCCCTTCAACCAGCTGT    | miR-133-3p   | 1.5               | 0.65                       |
| 14     | TATCACAGCCATTTTGACGAGTT  | miR-13-3p    | 539.59            | 332.78                     |
| 15     | TCGTAAAAATGGTTGTGCTGT    | miR-13-5p    | 20.47             | 16.02                      |
| 16     | TATTGCTTGAGAATACACGTAG   | miR-137      | 0.35              | 0                          |
| 17     | TCAGTCTTTTTCTCTCTCT      | miR-14       | 7725.12           | 5398.97                    |
| 18     | TGGACGGAGAAGTATAAGGGC    | miR-184-3p   | 81027.58          | 83651.55                   |
| 19     | TGAAATCTTTGATTAGGTCTGG   | miR-1890     | 24.52             | 16.45                      |
| 20     | TGAGGAGTTAATTTGCGTGTT    | miR-1891     | 0                 | 0.22                       |
| 21     | CCCAGGAATCAACATATTATT    | miR-190-3p   | 0.46              | 0.22                       |
| 22     | AGATATGTTTGATATTCTGGTTG  | miR-190-5p   | 219.38            | 78.59                      |
| 23     | TACTGGCCTACTAAGTCCCAA    | miR-193      | 0.12              | 0                          |
| 24     | CTTGTGCGTGTGACAACGGCT    | miR-210-3p   | 0.93              | 0.87                       |
| 25     | AGCTGCTGACCCTGCACAAGA    | miR-210-5p   | 0.12              | 0                          |
| 26     | TGATTGTCCAAACGAATTTCTG   | miR-219      | 0.23              | 0                          |
| 27     | CTGCTGCCCAAGTGCTTAT      | miR-252-3p   | 12.26             | 5.63                       |
| 28     | CTAAGTACTAGTGCCGCAGGA    | miR-252-5p   | 1719.74           | 1768.7                     |
| 29     | AATGGCACTGGAAGAATTCAC    | miR-263a-5p  | 8.21              | 4.55                       |
| 30     | TCAGGTACTGAAGTAGCGCGC    | miR-275-3p   | 2392.56           | 3182.31                    |
| 31     | TAGGAATTCATACCGTGCTCT    | miR-276-3p   | 4000.47           | 4445.45                    |
| 32     | TGGTAACTCCACCACGTTGGC    | miR-2765     | 191.16            | 161.95                     |
| 33     | AGCGAGGTATAGAGTTCCTACG   | miR-276-5p   | 3.35              | 3.25                       |
| 34     | TAAATGCACTATCTGGTACGAC   | miR-277-3p   | 2673.22           | 2318.64                    |
| 35     | ATCCGGCTCGAAGGACCA       | miR-2779     | 13.18             | 14.72                      |
| 36     | TCGGTGGGACTTTCTGCTGTT    | miR-278-3p   | 60.83             | 36.37                      |
| 37     | TGACTAGATCCACACTCATT     | miR-279      | 338.95            | 281.03                     |
| 38     | GTAGGCCGGCGAAACTACTTGC   | miR-2796     | 0.12              | 0                          |
| 39     | TGTCATGGAATTGCTCTCTTTA   | miR-281-3p   | 20.82             | 15.59                      |
| 40     | AAGAGAGCTGTCGCTCGACAGT   | miR-281-5p   | 4829.63           | 5092.82                    |
| 41     | CAATATCAGCTGGTAATTCTG    | miR-283      | 1.73              | 5.85                       |
| 42     | TAGCACCATTCGAAATCAGTAC   | miR-285      | 0.46              | 0.22                       |
| 43     | TGACTAGACCGAACACTCGCGT   | miR-286a     | 5.32              | 6.06                       |
| 44     | TGACTAGACCGAACACTCGTGCC  | miR-286b     | 0                 | 12.34                      |
| 45     | GTCGACAGGGAGATAAATCACT   | miR-2940-3p  | 32669.5           | 16188.68                   |
| 46     | TATCACAGCAGTAGTTACCT     | miR-2944a-3p | 0.12              | 0                          |
| 47     | TATCACAGCAGTAGTTACC      | miR-2944b-3p | 4.39              | 4.76                       |
| 48     | GAAGGAACTCCCGGTGTGATATT  | miR-2944b-5p | 13.65             | 15.37                      |
| 49     | TGACTAGAGGCAGACTCGTTT    | miR-2945-3p  | 279.05            | 166.07                     |

**Table 2.** Cont.

| S. No. | Sequence                 | miRNA        | Singh's cell line | Infected Singh's cell line |
|--------|--------------------------|--------------|-------------------|----------------------------|
| 50     | AGCTCAGCACGCGAGGGGC      | miR-2951-5p  | 0.35              | 0.43                       |
| 51     | TATCACAGCCAGCTTTGAAGA    | miR-2a-3p    | 1043.34           | 911.52                     |
| 52     | TATCACAGCCAGCTTTGATGAGCT | miR-2b       | 925.73            | 348.15                     |
| 53     | TATCACAGCCAGCTTTGA       | miR-2c-3p    | 11.56             | 2.38                       |
| 54     | CGGCACATGTTGGAGTACACTT   | miR-305-3p   | 111.25            | 319.79                     |
| 55     | ATTGTACTTCATCAGGTGCTCTGG | miR-305-5p   | 689.82            | 509.24                     |
| 56     | GAGAGCACCTCGGTATCTAAGC   | miR-306-3p   | 0.35              | 0.87                       |
| 57     | TCACAACCTCCTTGAGTGAGC    | miR-307      | 1.62              | 2.17                       |
| 58     | AATCACAGGAGTATACTGT      | miR-308-3p   | 23.71             | 21.22                      |
| 59     | TCACTGGGCAAAGTTTGTCCG    | miR-309a     | 43.37             | 32.69                      |
| 60     | TGGCAAGATGTTGGCATAGCT    | miR-31       | 0.58              | 0.22                       |
| 61     | TTTTGATTGTGCTCAGAAAGCC   | miR-315      | 1.04              | 0.22                       |
| 62     | GTGCATTGTAGTTGCATTGCA    | miR-33-5p    | 35.97             | 15.81                      |
| 63     | TGGCAGTGTGGTTAGCTGGTTGT  | miR-34-5p    | 89.05             | 59.76                      |
| 64     | TTTGTTCGTTGGCTCGAGTTA    | miR-375      | 3.58              | 1.73                       |
| 65     | TCTCACTACCTGTCTTTCA      | miR-71-3p    | 745.9             | 596.28                     |
| 66     | AGAAAGACATGGGTAGTGAGAT   | miR-71-5p    | 20.47             | 20.14                      |
| 67     | TGGAAGACTAGTATTTTGTGT    | miR-7-5p     | 15.03             | 6.71                       |
| 68     | ATAAAGCTAGATTACCAAAGC    | miR-79-3p    | 16.07             | 14.51                      |
| 69     | CTTTGGCGCTTAGCTGTATGA    | miR-79-5p    | 1.04              | 1.52                       |
| 70     | TAATACTGTCAGGTAAGATGTC   | miR-8-3p     | 2808.76           | 2397.23                    |
| 71     | CATCTTACCGGCAGCATTAGA    | miR-8-5p     | 281.01            | 457.28                     |
| 72     | TTTAGAATTCTACGCTTTACC    | miR-927a     | 0.46              | 1.73                       |
| 73     | AAATTGACTCTAGTAGGGAGT    | miR-929-5p   | 0.46              | 0.87                       |
| 74     | TATTGCACTTGCCCGCCT       | miR-92a-3p   | 14.46             | 22.3                       |
| 75     | AATTGCACTTGCCCGCCTGC     | miR-92b-3p   | 128.48            | 95.48                      |
| 76     | TCAATTCGTAGTGATTGCACT    | miR-932-5p   | 0.12              | 0                          |
| 77     | TGAAACCGTCCAAAAGTGGGC    | miR-957      | 1.73              | 1.3                        |
| 78     | TAAGCGTATAGCTTTCCCAT     | miR-965      | 1.39              | 0.87                       |
| 79     | TCATAAGACACAGCGGCTAT     | miR-970      | 558.56            | 514.44                     |
| 80     | TAGTGCCTAGTGAAGGGCT      | miR-980-3p   | 333.86            | 282.55                     |
| 81     | CCCCTTGTGCAAACCTCACGC    | miR-988-3p   | 58.17             | 71.88                      |
| 82     | GTGTGCTTTGTGACAATGAGA    | miR-988-5p   | 0.46              | 0                          |
| 83     | TGTGATGTGACGTAGTGGTAC    | miR-989      | 0.46              | 0.22                       |
| 84     | TGACTAGATTACATGCTCGT     | miR-996      | 263.9             | 205.25                     |
| 85     | TAGCACCATGAGATTCAGCTC    | miR-998-3p   | 47.88             | 58.89                      |
| 86     | TGTTAACTGTAAGACTGTGTCT   | miR-999      | 349.13            | 249.21                     |
| 87     | TCTTTGGTTATCTAGCTGTAT    | miR-9a       | 0.23              | 0.87                       |
| 88     | TAAAGCTTAGTACCAGAGGTC    | miR-9c-3p    | 100.73            | 119.08                     |
| 89     | TCTTTGGTATTCTAGCTGTAGA   | miR-9c-5p    | 133.11            | 78.16                      |
| 90     | TTACGTATACTGAAGGTAT      | miR-iab-8-5p | 0.12              | 0                          |

doi:10.1371/journal.pntd.0002616.t002

toires of miRNAs showing distinct expression pattern upon CHIKV infection in *Aedes* and *Plasmodium* infection in *Anopheles*. Amongst these miRNAs, one miRNA, miR-2944-5p showed up-regulation upon both CHIKV and Plasmodium infections. Similarly, miR-2b showed significant down-regulation in both insects. Targets for these two miRNAs were also predicted, subjected to KOBAS analysis and pathway analysis performed. It

was seen that target prediction of aal-miR-2944b-5p revealed 395 targets in *Aedes* and ast-miR-2944b-5p showed 392 targets in *Anopheles*. Four pathways namely, protein processing in endoplasmic reticulum, citrate cycle (TCA cycle), ribosome and ubiquitin mediated proteolysis were found to be common among them (Fig. 4a). Network analysis of the targets showed 13 transcripts are shared between the two insects (Fig. 4b). In addition to the above



**Table 3.** Details of additional 29 miRNAs identified after 1 mismatch data analysis in *Aedes albopictus*.

| miRNA       | Sequence                | TPM (SL)    | TPM (iSL)   |
|-------------|-------------------------|-------------|-------------|
| miR-11-5p   | CAAGAACTCCGGCTGTGACC    | 9.945368702 | 15.80545349 |
| miR-12-3p   | CAGTACTTATGTTATGCTCTCT  | 94.94357796 | 94.18318174 |
| miR-184-5p  | CCTTATCATTCTTCGCCCG     | 9.251505769 | 8.010983274 |
| miR-1889-3p | CACGTTACAGATTGGGGTTTCC  | 39.2032557  | 44.60169066 |
| miR-1889-5p | TAATCTCAAATTGTAACAGTGG  | 296.8576914 | 227.9882537 |
| miR-275-5p  | CGCGCTAAGCAGGAACCGAGAC  | 7.169916971 | 22.08433227 |
| miR-277-5p  | CGTGCAGAAAGTGCATTTACA   | 6.938629327 | 10.60914001 |
| miR-278-5p  | ACGGACGATAGTCTTCAGCGGCC | 28.2170926  | 37.67327269 |
| miR-286-3p  | TGACTAGACCGAACACTCGTGT  | 405.4472403 | 466.5856474 |
| miR-2940-5p | TGGTTTATCTTATCTGTCGAGGC | 5736.280508 | 4856.820995 |
| miR-2941    | TAGTACGGCTAGAACCACGG    | 47.41396707 | 57.59247435 |
| miR-2945-5p | AGCGGGTCCGTTTCTAGTGCATG | 7.63249226  | 8.444009396 |
| miR-2946    | TAGTACGGAAAAGATATGGGGA  | 7.63249226  | 6.495391843 |
| miR-2951-3p | TCTGCCCGTCCGTGTACTG     | 11.56438221 | 14.07334899 |
| miR-2a-5p   | ACTCTCAAAGTGGCTGTGAAA   | 11.68002603 | 18.62012328 |
| miR-306-5p  | TCAGGTACTCAGTACTCTCA    | 5063.696039 | 4191.69287  |
| miR-308-5p  | CGCGGTATATTCTTGGGCTT    | 21.04717563 | 48.71543883 |
| miR-309b-3p | TCACTGGGCATGTTTGTGCG    | 0.809506755 | 0.433026123 |
| miR-316     | TGTCTTTTTCCGCTTACTGCCT  | 0.115643822 | 0.216513061 |
| miR-317-3p  | TGAACACAGCTGGTGTATCT    | 1835.036169 | 1918.089212 |
| miR-317-5p  | CGGGATACACCCTGTGCTCGCT  | 74.12768998 | 153.5077606 |
| miR-34-3p   | CAACCACTATCCGCCCTGCCGCC | 43.59772094 | 76.86213682 |
| miR-745-3p  | TAGCTGCCTAGCGAAGGGCA    | 0.346931466 | 0.216513061 |
| miR-87      | GTGAGCAAATTTTCAGGTGTGT  | 37.93117365 | 18.40361022 |
| miR-92a-5p  | CGGTACGGACAGGGCAACATT   | 0.346931466 | 0.649539184 |
| miR-92b-5p  | AGGTCGTGACTGTGCTGTTTG   | 0.115643822 | 0           |
| miR-980-5p  | CGGCCGTTTCATGGGTCTAGC   | 7.516848438 | 20.56874084 |
| miR-998-5p  | ACTGAACTCTGTGGTCTGCA    | 1.156438221 | 3.03118286  |
| miR-9b      | TCTTTGGTGATTTTACTGTATG  | 40.59098156 | 18.83663635 |

doi:10.1371/journal.pntd.0002616.t003

mentioned pathways, targets in Immunity cluster were studied in detail in order to understand role of insect immunity during different infections. It was observed that four target genes belonging to Immunity were common to both the miRNAs and only 2 genes interacting with each other in the network (**Figure 5**).

**Table 4.** Novel miRNAs identified in *Aedes albopictus*.

| miRNA          | Sequence                    | SL      | iSL      |
|----------------|-----------------------------|---------|----------|
| novel-miR-1-5p | ATTAGAATGTGGAATCTGTTTT      | 0.35    | 0.12     |
| novel-miR-2-5p | TATTCGCATAACAGTCCCATG       | 3.3536  | 3.0311   |
| novel-miR-2-3p | CATGGGACTGTTATGCGAATA       | 7.7481  | 6.7119   |
| novel-miR-3    | AATTCGTGACTTGGGCTC          | 0.6938  | 0.433    |
| novel-miR-4    | AGGCTTGATGAATGGTTGAATGA     | 0.8095  | 1.299    |
| novel-miR-5    | CGTGATATTACTACTCGGA         | 1.7346  | 0.6495   |
| novel-miR-6    | TTCTGACGAAGCCCCTTGGTAC      | 1.8503  | 1.5155   |
| novel-miR-7    | TTTCGGATGTTTTAGAAATTCGTT    | 192.893 | 139.8674 |
| novel-miR-8    | TGTATCGTATGTCACACTCGAGGCCCT | 1.1564  | 0        |
| novel-miR-9    | TATTCGTCCTCAAACCCGCCT       | 23.1287 | 45.2512  |

doi:10.1371/journal.pntd.0002616.t004

In case of miR-2b, target prediction revealed that aal-miR-2b targeted 226 transcripts, whereas ast-miR-2b had 321 targets. KOBAS analysis of these targets showed two significant pathways for aal-miR-2b and five pathways for ast-miR-2b (**Figure 6a**), of which, ribosome pathway was found to be common. Interaction network of these targets with miRNA showed three common transcripts (AAEL010168, AAEL006511 and AAEL003427) were targeted by both the miRNA homologs (**Figure 6b**). No significant targets of immunity pathways were found for miR-2b.

## Discussion

In this study we have identified miRNAs of a major vector, *Aedes*, using an *Ae. albopictus* cell line and profiled their expression upon CHIKV infection using NextGen sequencing strategies. We identified 90 miRNAs in *Ae. albopictus* of which eight miRNAs common to both uninfected and infected Singh's line were differentially regulated upon CHIKV infection. Through computational biology, we have further predicted targets of the modulated miRNAs and studied the pathways of these targets. Using information of miRNAs that are modulated in *Anopheles* upon *Plasmodium* infection [22], we compared the expression profiles of the common miRNAs in these two distinct vectors upon specific pathogen infection. Even though the data sets derived are from two diverse conditions, i.e., whole insect in case of *Anopheles* and cell line in the case of *Aedes* which is an over-simplified derivation of the whole insect, the findings provide insight to understanding the role of miRNAs as seen in previous reports [33]. Our analysis show different miRNAs that are pathogen/insect specific are up-regulated in the two insects and several of the targets of these miRNAs interact with one another to perform their functions.

Deep sequencing has revealed that distinct repertoire of miRNAs are expressed abundantly in *Aedes*. It was observed that miR-184 was found to be most abundant in both libraries. Studies have shown that this miRNA multiple roles in female germinal development in *Drosophila* [34]. We also found miRNA-2940-3p to

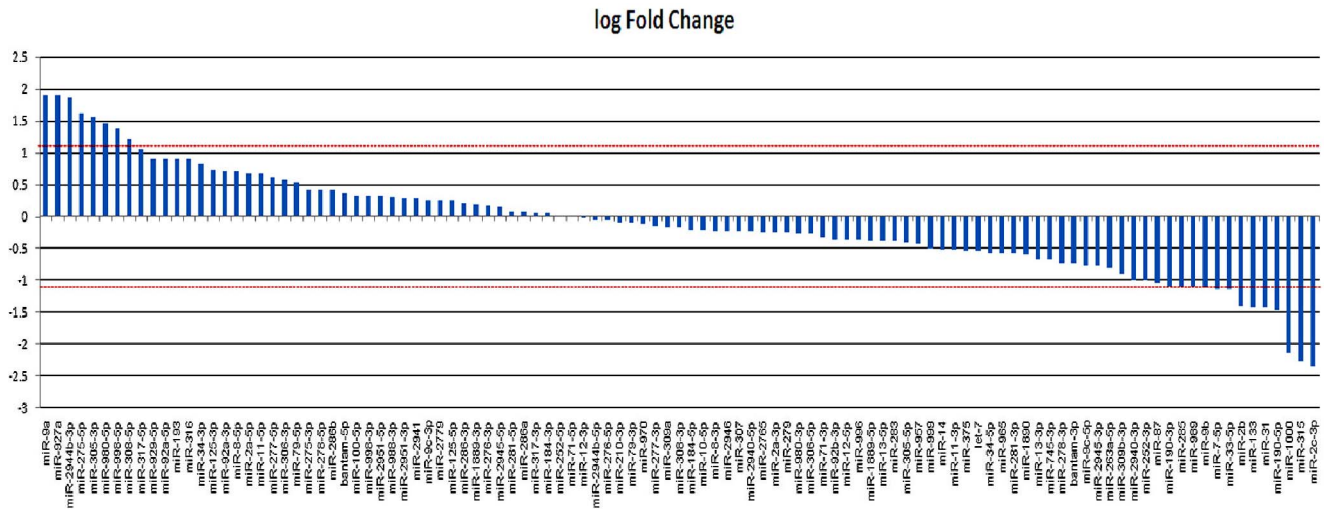

**Figure 1. The figure represents details of LogFold change ratios of miRNAs identified in SL and iSL libraries.**  
doi:10.1371/journal.pntd.0002616.g001

be expressed in abundance in *Aedes* as reported by Skalsky et al. [33]. A recent study has shown the involvement of this miRNA in *Wolbachia* colonization in *Aedes* [17]. It is interesting to note that the expression of miR-2940 was down-regulated upon CHIKV infection. Detailed studies are needed to understand the interplay between *Wolbachia* and other viruses in *Aedes* and the role this miRNA might play in their growth and development.

Upon CHIKV infection, we showed that distinct miRNAs, namely, miR-100, miR-305-3p, miR-283 and miR-927-5p were up-regulated in *Aedes*. Likewise, we also showed that miR-1000, miR-2b, miR-2c and miR-190-5p were down-regulated upon CHIKV infection. We used computational biology to predict the targets of these miRNAs. Using KOBAS, we identified that several metabolic and signaling pathways were altered upon CHIKV infection, with protein processing in endoplasmic reticulum being

the common pathway in three of the four up-regulated miRNAs analyzed. Viral replication is active in the first 24 hours of infection and most of the host transcription machinery is hijacked by the virus which could be the reason for these pathways being affected upon infection. Another pathway that was significantly altered was part of the immunity pathway showcasing the involvement of insect immunity upon pathogen infection and the role microRNAs may be playing in regulation of insect immune system.

We further proceeded to evaluate the interactions of the predicted transcripts in these pathways with the miRNAs. We observed that several of the transcripts were common among the miRNAs. Of interest were three transcripts that were common among three of the four up-regulated miRNAs. It was seen that these three transcripts encoded for a protein tyrosine phosphatase

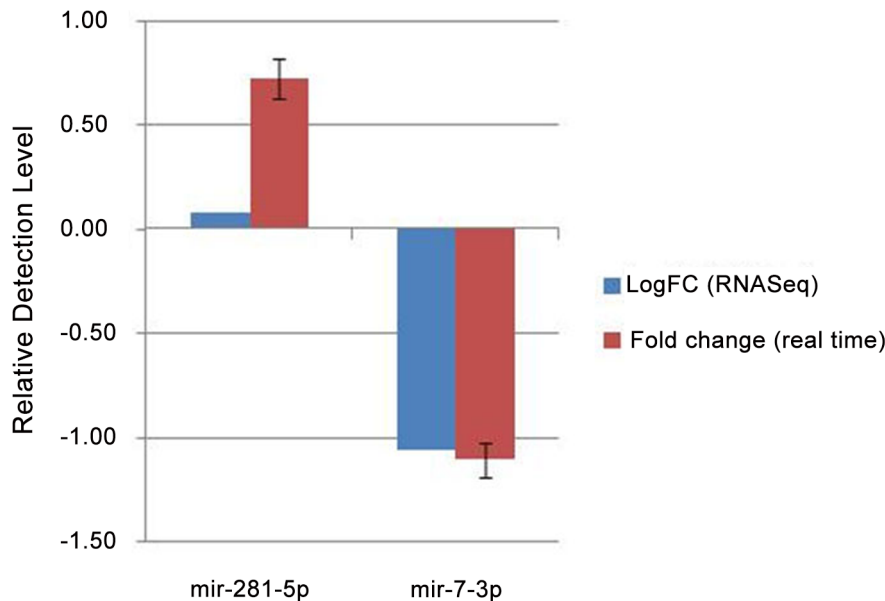

**Figure 2. Real Time PCR data analysis of miR-281-5p and miR-7-3p.** Fold change value obtained from RNA-Seq analysis are also represented in the figure.  
doi:10.1371/journal.pntd.0002616.g002



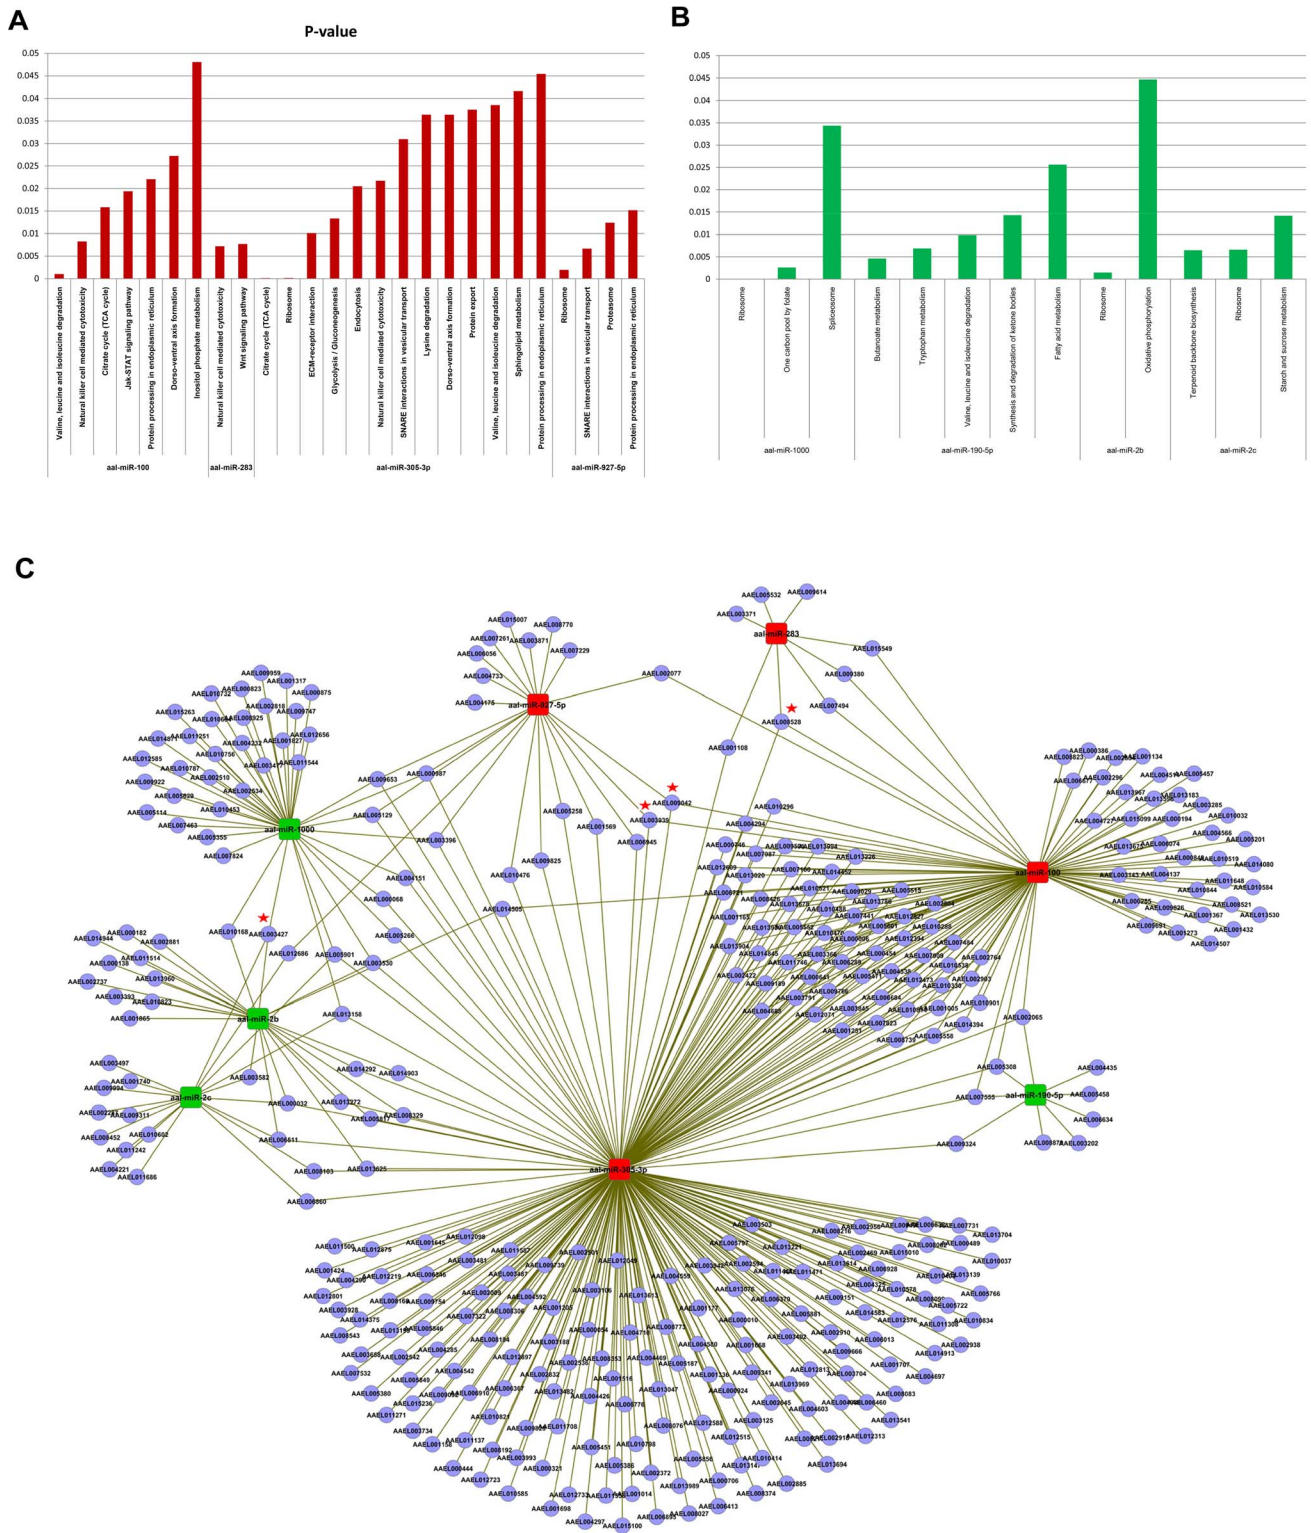

**Figure 3. miRNA-target KOBAS analysis and interaction network of significantly up-regulated and down-regulated miRNAs of *Ae. aegypti*.** (A) Graph represents significant pathways of up-regulated miRNAs after KOBAS analysis. (B) Graph represents significant pathways of down-regulated miRNAs after KOBAS analysis. (C) The targets common among the miRNAs are represented by red color star. Up-regulated miRNAs are shown by red color rectangle and green color rectangles represent down-regulated miRNAs. Names of all miRNAs and targets are shown in figures. doi:10.1371/journal.pntd.0002616.g003

**A**

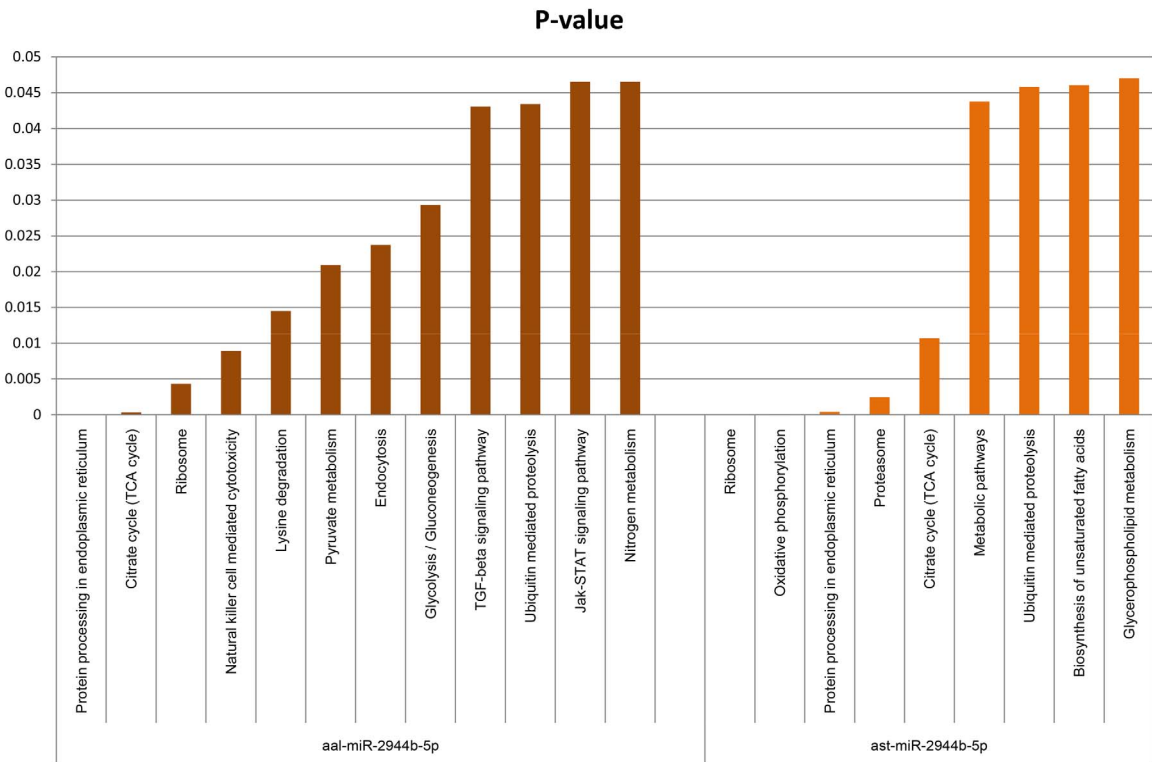

**B**

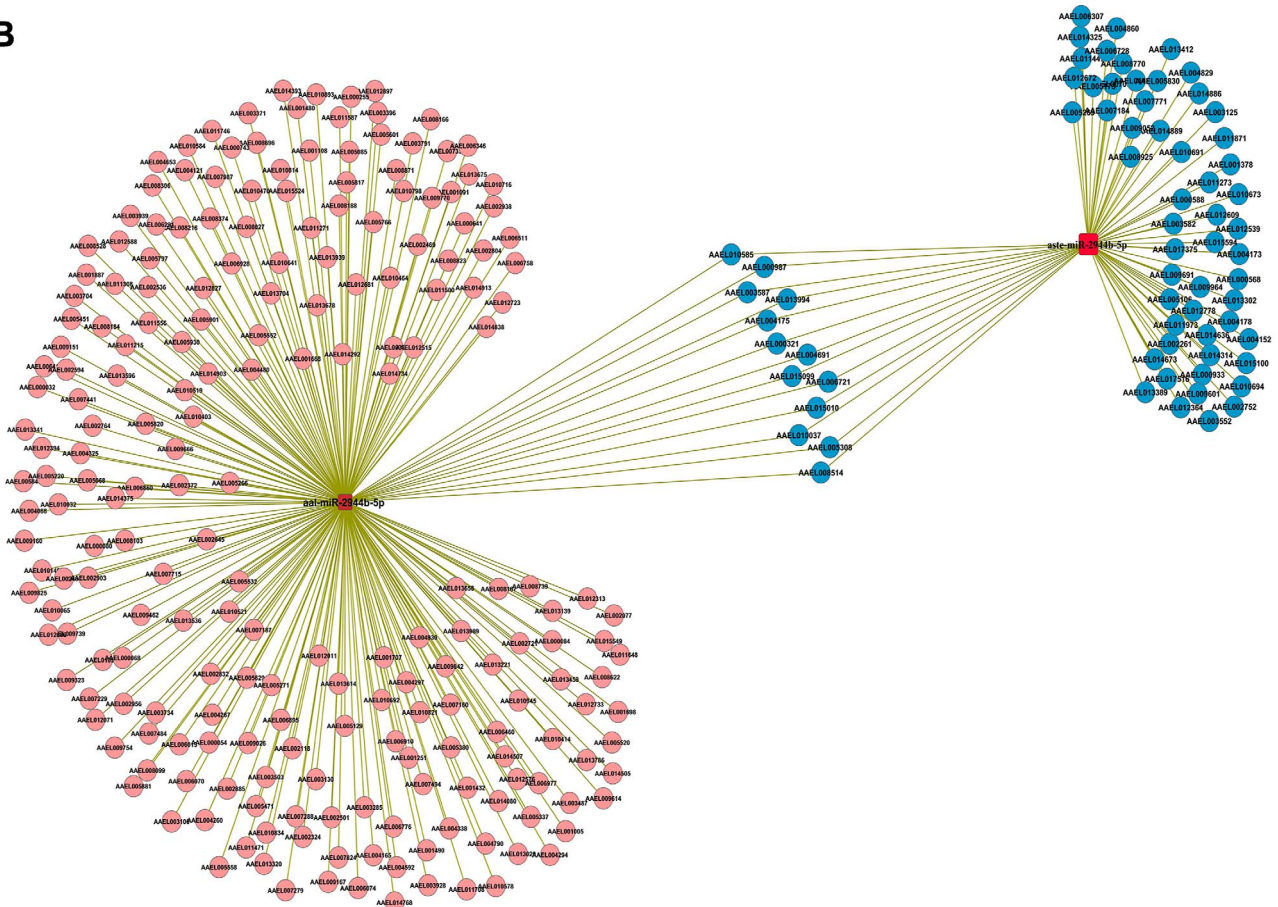





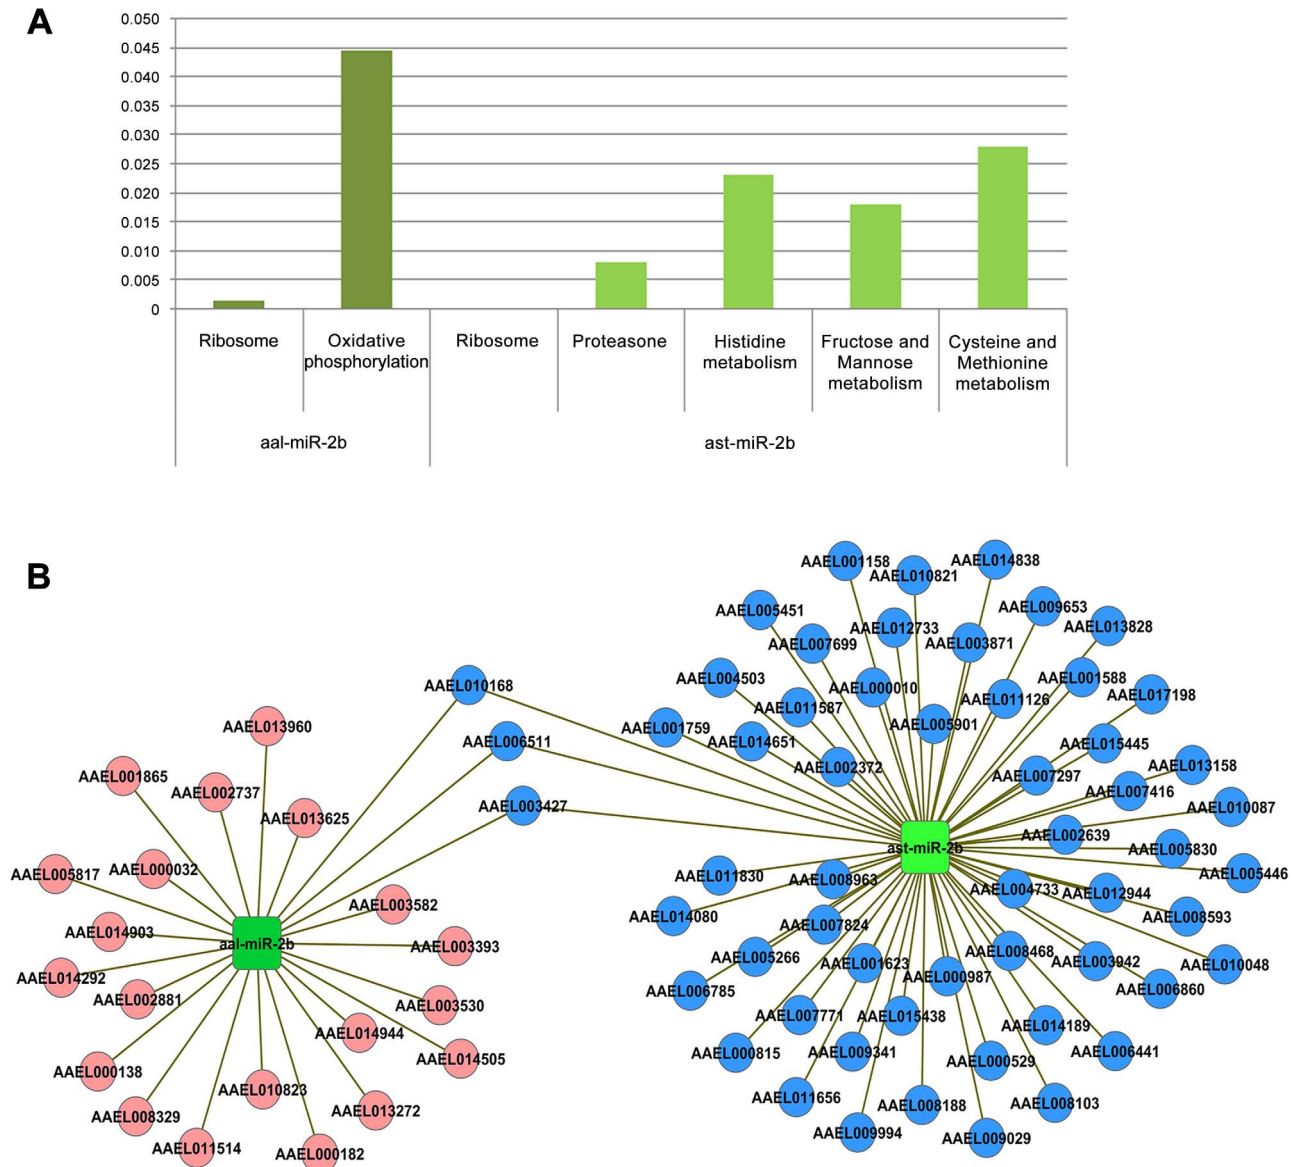

**Figure 6. miRNA-targets KOBAS analysis and interaction network of miR-2b of *Anopheles stephensi* and *Aedes aegypti*.** (A) Graph represents significant pathways of aal-miR-2b and ast-miR-2b after KOBAS analysis. (B) miRNA-target interaction network of miR-2b of both the insects showing the shared common targets.  
doi:10.1371/journal.pntd.0002616.g006

performed throwing light to the possible role of these miRNAs. Further comparison of some of these *Aedes* miRNAs with data generated from *An. stephensi* miRNAs regulate upon *Plasmodium* infection has revealed interesting information on microRNAs of these two important vectors, upon pathogen infection. While *An. stephensi* is an important urban vector of South East Asia, *Ae. albopictus* is gaining notoriety for the spread of chikungunya and more recently dengue. Analysis of the expression of miRNAs and their putative targets in our study have provided important action points for studying the basis of pathogenesis in these vectors.

## Supporting Information

**Figure S1** Pictorial representation of the workflow followed for identification and analysis of non-coding RNAs and targets in this

study. (A) The figure represents the workflow for identifying known miRNA, novel miRNA and their targets using 3'UTR sequences. (B) The figure represents workflow for the identification of targets of significantly upregulated miRNAs and downregulated miRNAs and KOBAS pathway analysis of the targets for the identification of significant pathways.

(TIF)

**Figure S2** The figure represents the structures of novel miRNAs identified in this study.

(TIF)

**Table S1** List of common miRNAs between SL and iSL libraries identified in this study. miRNA sequences and TPM values are written along with the miRNAs.

(DOCX)

## Acknowledgments

Small RNA Truseq RNA was sequenced at NextGenBio Life Sciences, New Delhi. We acknowledge the technical assistance of Mr. Shashi Shekhar Singh.

## References

- Bhatt S, Gething PW, Brady OJ, Messina JP, Farlow AW, et al. (2013) The global distribution and burden of dengue. *Nature* 496: 504–7.
- Gething PW, Elyazar IRF, Moyes CL, Smith DL, Battle KE, et al. (2012) A long neglected world malaria map: *Plasmodium vivax* endemicity in 2010. *PLoS neglected tropical diseases* 6: e1814.
- Blagborough AM, Churcher TS, Upton LM, Ghani AC, Gething PW, et al. (2013) Transmission-blocking interventions eliminate malaria from laboratory populations. *Nature communications* 4: 1812.
- DeGennaro M, McBride CS, Seeholzer L, Nakagawa T, Dennis EJ, et al. (2013) orco mutant mosquitoes lose strong preference for humans and are not repelled by volatile DEET. *Nature* 498: 487–491.
- Lefevre T, Vantaux A, Dabire KR, Mouline K, Cohuet A (2013) Non-genetic determinants of mosquito competence for malaria parasites. *PLoS Pathog* 9: e1003365.
- Mitri C, Vernick KD (2012) *Anopheles gambiae* pathogen susceptibility: the intersection of genetics, immunity and ecology. *Curr Opin Microbiol* 15: 285–291.
- Povelones M, Waterhouse RM, Kafatos FC, Christophides GK (2009) Leucine-rich repeat protein complex activates mosquito complement in defense against *Plasmodium* parasites. *Science* 324: 258–261.
- Spence PJ, Jarra W, Levy P, Reid AJ, Chappell L, et al. (2013) Vector transmission regulates immune control of *Plasmodium* virulence. *Nature* 498: 228–231.
- Tsetsarkin KA, Vanlandingham DL, McGee CE, Higgs S (2007) A single mutation in chikungunya virus affects vector specificity and epidemic potential. *PLoS Pathog* 3: e201.
- Blair CD (2011) Mosquito RNAi is the major innate immune pathway controlling arbovirus infection and transmission. *Future Microbiol* 6: 265–277.
- Ding SW, Voinnet O (2007) Antiviral immunity directed by small RNAs. *Cell* 130: 413–426.
- Lucas KJ, Myles KM, Raikhel AS (2013) Small RNAs: a new frontier in mosquito biology. *Trends Parasitol* 29: 295–303.
- Sanchez-Vargas I, Scott JC, Poole-Smith BK, Franz AW, Barbosa-Solomieu V, et al. (2009) Dengue virus type 2 infections of *Aedes aegypti* are modulated by the mosquito's RNA interference pathway. *PLoS Pathog* 5: e1000299.
- Myles KM, Wiley MR, Morazzani EM, Adelman ZN (2008) Alphavirus-derived small RNAs modulate pathogenesis in disease vector mosquitoes. *Proc Natl Acad Sci U S A* 105: 19938–19943.
- Morazzani EM, Wiley MR, Murreddu MG, Adelman ZN, Myles KM (2012) Production of virus-derived ping-pong-dependent piRNA-like small RNAs in the mosquito soma. *PLoS Pathog* 8: e1002470.
- Vodovar N, Bronkhorst AW, van Cleef KW, Miesen P, Blanc H, et al. (2012) Arbovirus-derived piRNAs exhibit a ping-pong signature in mosquito cells. *PLoS One* 7: e30861.
- Hussain M, Frentiu FD, Moreira LA, O'Neill SL, Asgari S (2011) *Wolbachia* uses host microRNAs to manipulate host gene expression and facilitate colonization of the dengue vector *Aedes aegypti*. *Proc Natl Acad Sci U S A* 108: 9250–9255.
- Pfeffer S, Baumert TF (2010) Impact of microRNAs for pathogenesis and treatment of hepatitis C virus infection. *Gastroenterol Clin Biol* 34: 431–435.
- Winter F, Edaye S, Huttenhofer A, Brunel C (2007) *Anopheles gambiae* miRNAs as actors of defence reaction against *Plasmodium* invasion. *Nucleic Acids Res* 35: 6953–6962.
- Ambros V (2003) MicroRNA pathways in flies and worms: growth, death, fat, stress, and timing. *Cell* 113: 673–676.

## Author Contributions

Conceived and designed the experiments: SS RKB. Performed the experiments: SJ. Analyzed the data: JS JJ SJ. Contributed reagents/materials/analysis tools: JS JJ SS RKB. Wrote the paper: SS RKB JS.

- Chawla G, Sokol NS (2011) MicroRNAs in *Drosophila* development. *Int Rev Cell Mol Biol* 286: 1–65.
- Jain S, Rana V, Shrinet J, Sharma A, Tridibes A, et al (2013). Blood feeding and *Plasmodium* infection alters the miRNome of *Anopheles stephensi*. (Communicated)
- Shrinet J, Jain S, Sharma A, Singh SS, Mathur K, et al. (2012) Genetic characterization of Chikungunya virus from New Delhi reveal emergence of a new molecular signature in Indian isolates. *Virol J* 9: 100.
- Griffiths-Jones S, Grocock RJ, van Dongen S, Bateman A, Enright AJ (2006) miRBase: microRNA sequences, targets and gene nomenclature. *Nucleic Acids Res* 34: D140–144.
- Huang Y, Niu B, Gao Y, Fu L, Li W (2010) CD-HIT Suite: a web server for clustering and comparing biological sequences. *Bioinformatics* 26: 680–682.
- Kin T, Yamada K, Terai G, Okida H, Yoshinari Y, et al. (2007) tRNAdb: a platform for mining/annotating functional RNA candidates from non-coding RNA sequences. *Nucleic Acids Res* 35: D145–148.
- Megy K, Emrich SJ, Lawson D, Campbell D, Dyalnas E, et al. (2012) VectorBase: improvements to a bioinformatics resource for invertebrate vector genomics. *Nucleic Acids Res* 40: D729–734.
- Langmead B, Trapnell C, Pop M, Salzberg SL (2009) Ultrafast and memory-efficient alignment of short DNA sequences to the human genome. *Genome Biol* 10: R25.
- Lorenz R, Bernhart SH, Honer Zu Siederdisen C, Tafer H, Flamm C, et al. (2011) ViennaRNA Package 2.0. *Algorithms Mol Biol* 6: 26.
- Kruger J, Rehmsmeier M (2006) RNAhybrid: microRNA target prediction easy, fast and flexible. *Nucleic Acids Res* 34: W451–454.
- Xie C, Mao X, Huang J, Ding Y, Wu J, et al. (2011) KOBAS 2.0: a web server for annotation and identification of enriched pathways and diseases. *Nucleic Acids Res* 39: W316–322.
- Smoot ME, Ono K, Ruscheinski J, Wang PL, Ideker T (2011) Cytoscape 2.8: new features for data integration and network visualization. *Bioinformatics* 27: 431–432.
- Skalsky RL, Vanlandingham DL, Scholle F, Higgs S, Cullen BR (2010) Identification of microRNAs expressed in two mosquito vectors, *Aedes albopictus* and *Culex quinquefasciatus*. *BMC Genomics* 11: 119.
- Iovino N, Pane A, Gaul U (2009) miR-184 has multiple roles in *Drosophila* female germline development. *Dev Cell* 17: 123–133.
- Katsuma S, Mita K, Shimada T (2007) ERK- and JNK-dependent signaling pathways contribute to *Bombyx mori* nucleopolyhedrovirus infection. *J Virol* 81: 13700–13709.
- Pleschka S, Wolff T, Ehrhardt C, Hobom G, Planz O, et al. (2001) Influenza virus propagation is impaired by inhibition of the Raf/MEK/ERK signalling cascade. *Nat Cell Biol* 3: 301–305.
- Xu J, Hopkins K, Sabin L, Yasunaga A, Subramanian H, et al. (2013) ERK signaling couples nutrient status to antiviral defense in the insect gut. *Proc Natl Acad Sci U S A* 110: 15025–15030.
- Ahmed Z, Lin CC, Suen KM, Melo FA, Levitt JA, et al. (2013) Grb2 controls phosphorylation of FGFR2 by inhibiting receptor kinase and Shp2 phosphatase activity. *J Cell Biol* 200: 493–504.
- Tan SL, Nakao H, He Y, Vijaysri S, Neddermann P, et al. (1999) NS5A, a nonstructural protein of hepatitis C virus, binds growth factor receptor-bound protein 2 adaptor protein in a Src homology 3 domain/ligand-dependent manner and perturbs mitogenic signaling. *Proc Natl Acad Sci U S A* 96: 5533–5538.
- Chen Z, Kolokoltsov AA, Wang J, Adhikary S, Lorinczi M, et al. (2012) GRB2 interaction with the ecotropic murine leukemia virus receptor, mCAT-1, controls virus entry and is stimulated by virus binding. *J Virol* 86: 1421–1432.
